# Supplementary material
Source: Springer Nature journal article supplement (https://www.springermedizin.de/resource/supplementary/13058_2010_2627_MOESM4_ESM.pdf/9702184)

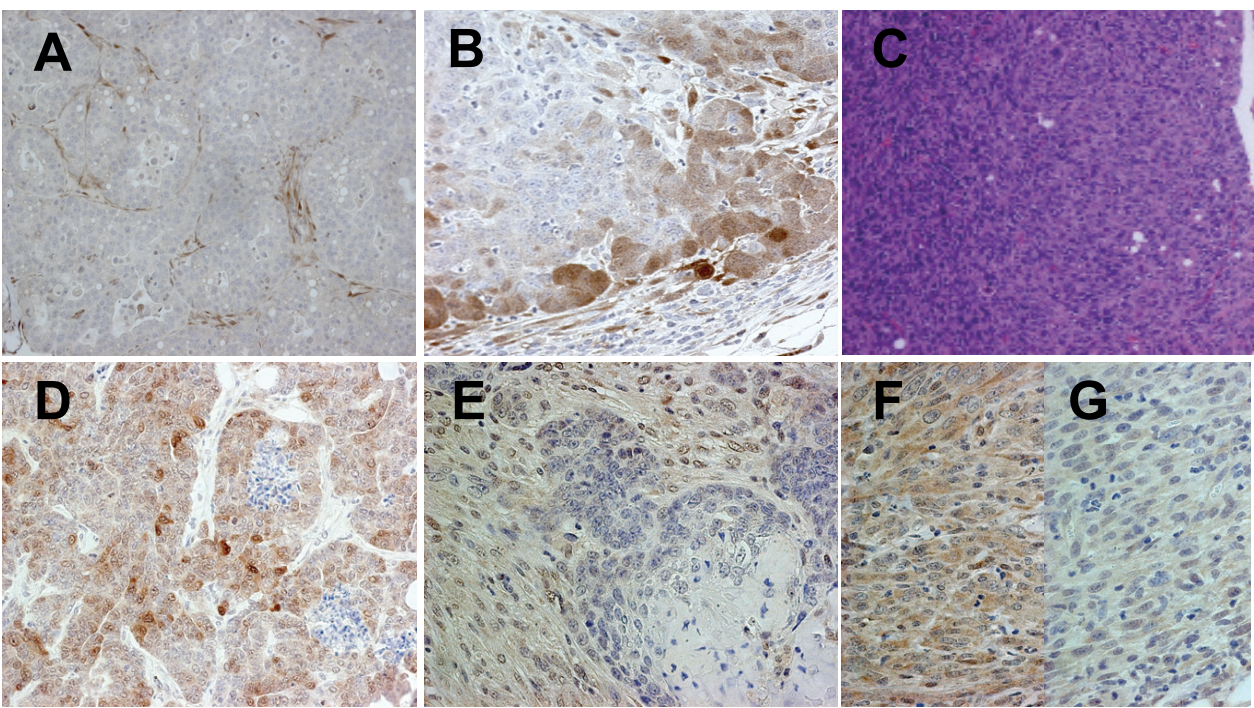

**H. *Vimentin***

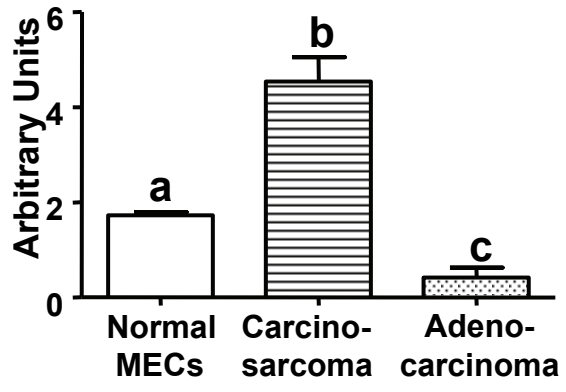

**I. *Keratin 8***

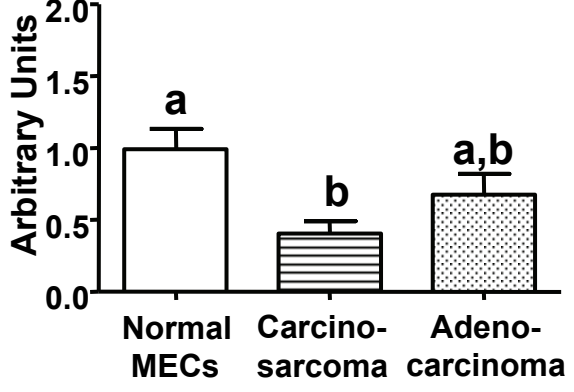

**J. *Mmp9***

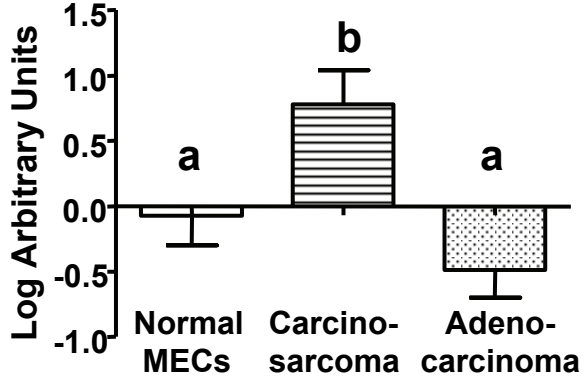

Supplement: MOESM4 [file 9702184]
